# Supplementary figures and images for: An improved one-pot multicomponent strategy for the preparation of thiazoline, thiazolidinone and thiazolidinol scaffolds
Source: Royal Society of Chemistry journal article supplement (doi:10.1039/c5ra17278k), 2015-01-01

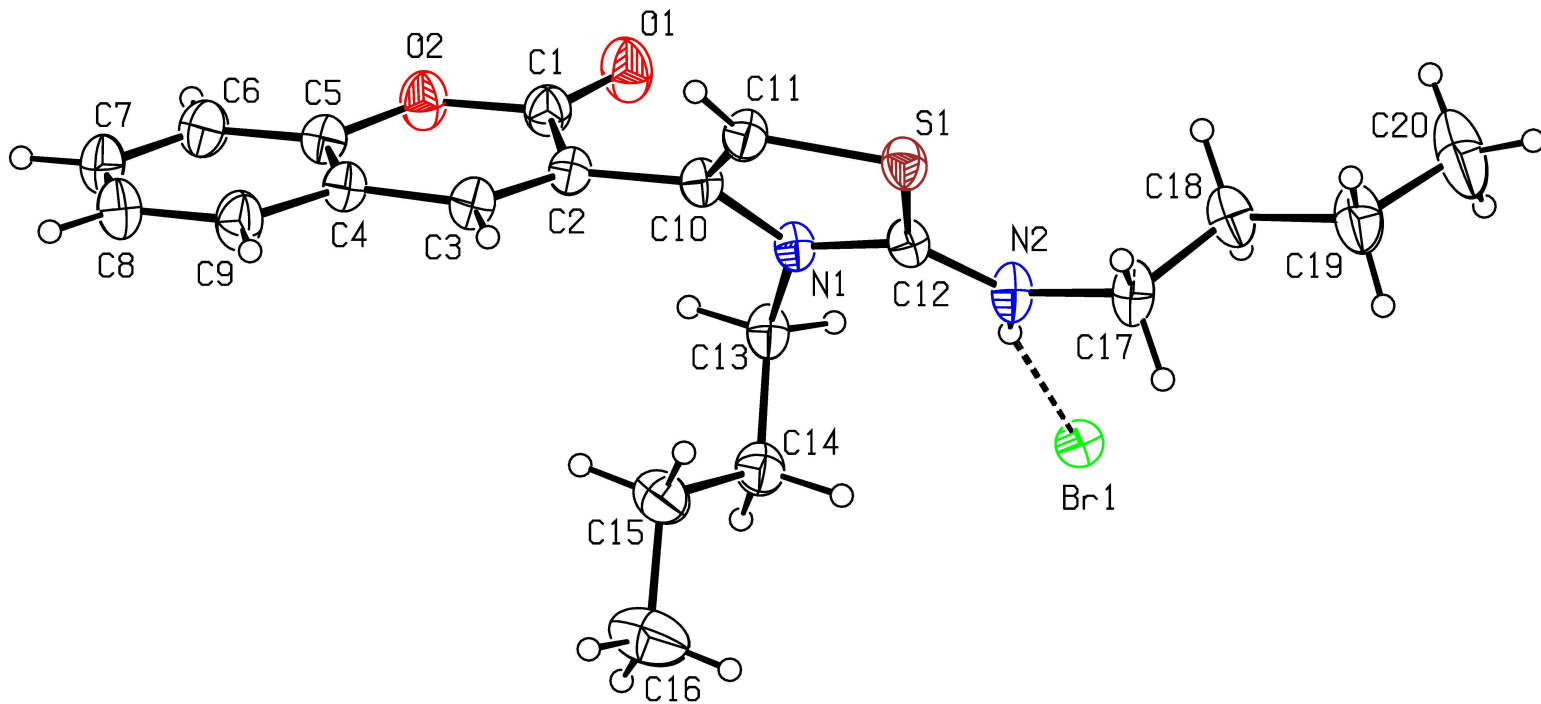

Supplement: c5ra17278k4.pdf [file c5ra17278k4.pdf]
